1 **RNA-silencing induces target gene relocalization toward a specialized nuage**  
2 **domain**

3

4 Yuchen Yang<sup>1</sup>, David Grunwald<sup>1</sup>, James R. Priess<sup>2,3</sup> and Craig C. Mello<sup>1,4,5\*</sup>

5

6

7 **Author Affiliations:**

8 1. RNA Therapeutics Institute, University of Massachusetts Medical School,  
9 Worcester, MA 01605

10 2. Fred Hutchinson Cancer Research Center, Seattle, Washington, United States

11 3. Department of Biology, University of Washington, Seattle, Washington, United States

12 4. Program in Molecular Medicine, University of Massachusetts Medical School,  
13 368 Plantation Street, Worcester, MA, 01605 United States

14 5. Howard Hughes Medical Institute, University of Massachusetts Medical School,  
15 Worcester, MA, USA

16 \* Correspondence, [Craig.Mello@umassmed.edu](mailto:Craig.Mello@umassmed.edu).

17 **Argonaute small RNA pathways maintain genome integrity and fertility by**  
18 **enforcing the transgenerational silencing of transposons as well as many**  
19 **developmentally regulated germline genes <sup>1</sup>. To propagate silencing, Argonaute**  
20 **pathways coordinate heterochromatin silencing with cycles of small RNA**  
21 **amplification <sup>2</sup>. In animal germlines, mRNA surveillance is thought to occur within**  
22 **cytoplasmic perinuclear domains called nuage <sup>3</sup>. In *C. elegans* 20-50 nuage**  
23 **droplets called P granules surround each pachytene germline nucleus. P**  
24 **granules are known to host many of the Argonaute small RNA systems that carry**  
25 **out transcriptome surveillance, but what if any specific roles P granules might**  
26 **play in Argonaute silencing have remained mysterious. Here we show that RNAi**  
27 **triggers the expansion of a unique P granule, which accumulates large amounts**  
28 **of the target RNA. As transcriptional silencing ensues, both alleles of the target**  
29 **gene relocate near the inner nuclear membrane (INM) directly adjacent this**  
30 **enlarged P granule. Similarly, during piRNA-mediated silencing, both alleles of a**  
31 **target gene reside adjacent to a P granule containing target RNA sequences. In**  
32 **an Argonaute mutant defective in piRNA silencing, the target RNA is released**  
33 **from nuage, and the target alleles dissociate from each other and from the INM.**  
34 **Our findings suggest that transcriptome-surveillance tasks are sub-divided**  
35 **between nuage domains that become specialized to coordinate small RNA**  
36 **silencing signals to their heterochromatin targets.**

37

38 In the *C. elegans* germline, two major Argonaute pathways initiated by different  
39 mechanisms—the piRNA pathway mediated by the Piwi Argonaute PRG-1 and the

40 dsRNA-initiated RNAi pathway mediated by the Argonaute RDE-1—rely on a common  
41 set of downstream small RNA and chromatin effectors that maintain heritable silencing<sup>4</sup>.  
42 Argonaute proteins and the machinery that produces their small RNA cofactors localize  
43 to perinuclear nuage, where they are thought to act in mRNA surveillance and in the  
44 amplification of small-RNA silencing signals<sup>4</sup>. In the *C. elegans* meiotic germline each  
45 perinuclear nuage, or P granule, is localized over a cluster of nuclear pores<sup>5</sup>, where it  
46 has the potential to intercept nascent mRNA *en route* to the cytoplasm<sup>6</sup>. Although  
47 previous cytological studies demonstrated the rapid loss of target mRNA in the  
48 cytoplasm during RNAi<sup>6,7</sup>, changes in the P granules or associated RNAs were not  
49 observed during silencing, and thus the dynamics and spatial relationships between  
50 nuage and the mRNA and DNA targets of silencing have remained mysterious.

51 Recent advances in RNA and DNA FISH technology have greatly enhanced the  
52 ability to track molecules at subcellular resolution<sup>8-10</sup>. For example, splinted fluorescent  
53 probes that assemble multiple fluorophores at a single target greatly amplify DNA FISH  
54 signals and permit detection of single genes<sup>9,10</sup>. We therefore decided to use these  
55 improved reagents to revisit the cytological events associated with Argonaute silencing.  
56 To visualize the spatial and temporal response to RNAi, we exposed worms to *oma-1*  
57 dsRNA and monitored *oma-1* mRNA- and DNA-FISH signals simultaneously over a time  
58 course of silencing. To distinguish cytoplasmic and nuclear FISH signals, we marked  
59 the outer membrane of the nuclear envelope using a GFP::ZYG-12 fusion protein<sup>11</sup>  
60 (Figure 1A-1F). In separate gonads we also imaged GFP::GLH-1, a marker for P  
61 granules, Figure 1G-L)<sup>12</sup>. We examined the pachytene region of the gonad, where  
62 germ cells are connected to a large, shared region of cytoplasm called the core. As

63 expected from previous studies, *oma-1* mRNA in untreated animals was present at low  
64 levels in P-granules and the surrounding cytoplasm, and was abundant in the gonad  
65 core (Figures 1A, 1D and 1J). In addition, we detected a double dot of *oma-1* RNA  
66 inside each germ nucleus throughout the pachytene region (Figure 1D), presumably  
67 representing transcription from the *oma-1* genes on the paired homologous  
68 chromosomes.

69 As expected, RNAi induced a rapid, marked depletion of *oma-1* mRNA in the  
70 germ cell cytoplasm and in the core cytoplasm (for example, compare Figure 1A to 1B  
71 and 1C). In the same gonads, however, an *oma-1* RNA signal appeared to increase  
72 within a large, perinuclear focus adjacent to each nucleus (Figure 1E). This perinuclear  
73 RNA signal persisted for several hours, ultimately decreasing in size by 21 hours  
74 (Figure 1C and 1F).

75 Prior to RNAi, the perinuclear P granules varied in size (green signal in Figures  
76 1G and 1J). By 6 hours of RNAi, one P granule on each nucleus appeared much larger  
77 than neighboring nuage, and colocalized with the prominent, enlarged *oma-1* RNA  
78 focus (Figures 1H and 1K). Thus, dsRNA-mediated silencing appears to trigger  
79 differentiation between the P granules on the same nucleus, with target RNA  
80 accumulating in only one enlarged P granule.

81 The location of the *oma-1* RNA signal within the nucleus exhibited dramatic  
82 changes during RNAi. Whereas prior to RNAi each pachytene nucleus exhibited paired  
83 foci of RNA signal, by 6 hours many nuclei exhibited only a single focus of nuclear RNA  
84 that was located directly adjacent the INM and the enlarged P granule (Figure 1E and

85 1K). By 21 hours the proportion of nuclei with this single focus of nuclear RNA had  
86 increased to 100% (Figure 1L).

87 Prompted by these striking changes in nuclear RNA localization we wished to  
88 examine whether the *oma-1* DNA undergoes similar changes. Prior to RNAi (at time  
89 zero), we detected *oma-1* DNA in two, well-separated foci (double dots) flanking the  
90 paired homologous chromosomes, and at variable distances from INM. These paired  
91 DNA signals precisely coincided with the aforementioned nuclear RNA signals (Figure  
92 1Ai-iii), and thus are likely to represent the *oma-1* transcription sites. By contrast, a  
93 single bright focus (single dot) of *oma-1* DNA signal was detected in ~40% of nuclei  
94 (n=31/77) after 6 hours of RNAi and in 100% of nuclei (n>100) after 21 hours (Figure 1B  
95 and 1C). These results suggest that RNAi causes the *oma-1* genes on the paired,  
96 homologous chromosomes to move close together, such that they can no longer be  
97 resolved as separate foci. Notably, in nuclei with the single dot of DNA signal, the DNA  
98 was always adjacent to the INM (Figure 1E and 1F), and directly beneath the  
99 perinuclear, enlarged P granule and RNA signals (for example, compare inset images in  
100 Figures 1H to 1K).

101 In order to determine whether genes in the RNAi pathway are required for the  
102 specialized nuage body, we repeated the above assays in the mutant *rde-3*. The *rde-3*  
103 gene encodes an effector of RNAi silencing that is required both in the animals exposed  
104 to dsRNA and for inherited silencing among their offspring<sup>13</sup>. We found that *oma-1*  
105 dsRNA did not trigger any of the cytological changes in *rde-3* mutants that were  
106 observed in wild-type worms: The double dots of *oma-1* DNA did not relocate toward  
107 the INM, low levels of *oma-1* RNA remained on many of the perinuclear P granules,

108 which appeared similar in size to those in untreated controls, and cytoplasmic *oma-1*  
109 mRNA remained abundant in the gonad core (Figure 2A and 2B and Sup Figure 2).  
110 Together these results show that RNAi triggers the development of a specialized  
111 enlarged nuage body, followed by localization of the target genes to the proximal INM.

112 RNAi is known to trigger nuclear events including the deposition of repressive  
113 chromatin on target loci <sup>14</sup>, and several studies have linked heterochromatin formation to  
114 the localization of a silent gene near the INM <sup>15</sup>. We therefore wondered whether the  
115 nuclear effectors of the RNAi pathway are required for formation of the specialized  
116 nuage domain and/or for the relocation of the target genes. To explore these  
117 possibilities we examined the role of two genes *wago-9/hrde-1* and *nrde-2* required for  
118 establishment of heterochromatin at the target locus and for transgenerational  
119 inheritance of silencing induced by RNAi. The *wago-9/hrde-1* gene encodes a nuclear  
120 Argonaute <sup>16-18</sup>, and *nrde-2* encodes a conserved nuclear protein that associates with  
121 the target chromatin <sup>14,19</sup>. Neither gene is essential for RNAi when a dsRNA trigger is  
122 present, but rather they are only required for transmission of silencing to unexposed  
123 offspring. Indeed, *oma-1* dsRNA induced cytological changes in both mutants that  
124 resembled in some respects the changes in wild-type animals. For example,  
125 cytoplasmic *oma-1* mRNA disappeared, and an enlarged P granule and focus of *oma-1*  
126 RNA appeared on each nucleus (compare Figure 2C to Figure 2E and 2G). However in  
127 contrast to wild-type worms, germ nuclei in both mutants exhibited two nuclear dots of  
128 *oma-1* DNA even at the 21 hr time point, and the dots did not relocate toward the INM.  
129 Moreover, by 21 hours the enlarged P granule had disappeared in both mutants, and  
130 lower, equivalent levels of *oma-1* RNA were observed in several P granules (compare

131 Figure 2D to 2F and 2H). These findings suggest that nuage specialization precedes  
132 the activities of WAGO-9 and NRDE-2 in the nuclear RNAi pathway to direct gene  
133 relocation and inherited silencing. The finding that multiple nuage domains ultimately  
134 accumulate RNA signal at later times in the nuclear-silencing mutants, suggests that  
135 stable differentiation of the specialized nuage domain on the nuclear perimeter requires  
136 DNA relocation.

137 The above findings indicate that dsRNA-induced transgenerational silencing  
138 involves the co-localization of target gene loci to a position on the INM directly adjacent  
139 a specialized perinuclear P granule where the corresponding target RNA accumulates.  
140 Because the *C. elegans* germline expresses tens of thousands of piRNAs that engage  
141 Piwi Argonautes to direct transgenerational silencing of transposons and endogenous  
142 genes<sup>4</sup>, we wondered if piRNA silencing might also direct a co-localization of target loci  
143 and a specialized P granule.

144 To address this possibility we examined the dosage compensation gene *xol-1*,  
145 which is a natural target of piRNA silencing<sup>20</sup>. *xol-1* is repressed in the adult germline  
146 of wild-type hermaphrodites, but is de-repressed by mutations in the Piwi Argonaute,  
147 *prg-1*. We first examined the XOL-1 (ON) state in *prg-1* mutants to determine where  
148 *xol-1* is expressed. Late pachytene nuclei in *prg-1* mutants had *xol-1* DNA and RNA  
149 signals similar to the signals seen for *oma-1* in wild-type nuclei without dsRNA. For  
150 example, *xol-1* mRNA was detected at low levels in the cytoplasm (Figure 3A late  
151 pachytene), and in several perinuclear P granules (Figure 3B), and there were two dots  
152 of *xol-1* DNA signal that were not localized by the INM (Figure 3A and B, late). Thus,

153 expression in the XOL-1(ON) state, in the absence of the piRNA pathway, closely  
154 resembles expression of an actively transcribed gene, *oma-1*, in wild-type nuclei.

155 To examine the repressed, XOL-1 (OFF) state, we next stained wild-type gonads  
156 with a functional piRNA pathway. We found that wild-type gonads lacked detectable *xol-*  
157 *1* RNA signal until late pachytene at which time there was a single focus of perinuclear  
158 *xol-1* RNA that was coincident with one P granule. DNA FISH revealed that the *xol-1*  
159 genes were localized to a single dot coincident with the nuclear RNA signal, and that  
160 these signals were by the INM and immediately adjacent to the unique P granule with  
161 *xol-1* RNA.

162 Although the piRNA-mediated regulation of *xol-1* in late pachytene germ cells  
163 closely mirrors the cytological state induced on *oma-1* after 21 hours of RNAi, our  
164 results suggest an additional, or different role for PRG-1 in early pachytene germ cells.  
165 Examination of *xol-1* RNA and DNA FISH signals during this earlier interval suggests  
166 that *prg-1* functions here to prevent the expression of a *xol-1* nuclear RNA. In the *prg-1*  
167 mutant this nuclear *xol-1* RNA signal accumulates in proximity to the paired loci at the  
168 INM but fails to export or accumulate detectably in the adjacent P granule (compare  
169 early pachytene in Figures 3A/B to Figures 3C/D). These findings suggest that in the  
170 absence of the piRNA pathway the *xol-1* genes begin transcribing many hours before  
171 they separate from the INM and begin to export mRNA. Whether this delay is a  
172 peculiarity of the *xol-1* locus or reflects more generally on piRNA regulation will require  
173 further study. Taken together, these results suggest that in wild-type animals the piRNA  
174 pathway prevents *xol-1* expression entirely in the early pachytene region, and when *xol-*  
175 *1* RNA expression commences in late pachytene, PRG-1 and piRNAs promote



176 accumulation of *xol-1* RNA in an adjacent P granule and the retention of the *xol-1*  
177 alleles in proximity to the INM beneath this specialized P granule.

178 Our results support a model in which transcriptome surveillance by Argonaute  
179 pathways is subdivided between specialized perinuclear nuage domains in the *C.*  
180 *elegans* germline (Figure 4). After the initiation of silencing either by piRNAs or dsRNA,  
181 cytoplasmic mRNA is rapidly cleared by cytoplasmic Argonautes including WAGO-1, -4,  
182 and -7 (yellow Argonautes in the model). By 6 hours, RNA signal becomes limited to a  
183 single distinct domain of nuage (a P granule), which expands to accommodate the  
184 captured mRNA and to coordinate the programming of the nuclear silencing machinery.  
185 Once loaded with these amplified small RNAs, nuclear Argonautes including WAGO-  
186 9/HRDE-1 (blue Argonaute in the model) along with other components of the nuclear  
187 RNAi pathway (including NRDE-2) help to initiate heterochromatin formation and co-  
188 transcriptional silencing. Interestingly, during RNAi the formation of an enlarged domain  
189 of nuage precedes and is independent of the nuclear silencing events, and thus  
190 appears to recruit or capture the target genes at the nuclear periphery directly adjacent  
191 the enlarged P granule.

192 After the target genes spatially connect to nuage, the nuage diminishes in size,  
193 perhaps reflecting the reduced transcriptional activity of the target locus. Indeed, when  
194 the nuclear RNAi machinery is disarmed by mutation (Model lower panel), a single  
195 enlarged focus of nuage forms during the first 6 hours of exposure to dsRNA, but the  
196 target genes ultimately fail to relocalize to the nuclear periphery and mRNA begins to  
197 accumulate in multiple additional P granules. Thus our results suggest that the  
198 transcriptional silencing machinery participates in a feedback loop that redirects the

199 target loci and mRNA export to a single domain of nuage. The continued low level  
200 transcription of the paired loci at the INM during pachytene may serve to supply  
201 template RNA to amplify within the adjacent nuage a small RNA signal that is then  
202 transmitted to offspring to propagate silencing.

203 Thousands of *C. elegans* germline mRNAs are targeted by nearly 1-million  
204 distinct Argonaute guide complexes. How the system can simultaneously utilize this  
205 many Argonautes to surveil gene expression has been entirely mysterious. Our findings  
206 suggest a partial answer to this mystery. Approximately 20 to 50 P granules surround  
207 each pachytene nucleus. Therefore, if each P granule is specialized to handle a subset  
208 of the RNA silencing load, then each granule need only harbor 50- to 20-thousand guide  
209 complexes. Moreover by co-localizing target genes adjacent to nuage domains that  
210 maintain their silencing, each P granule need only amplify small RNAs from 40 to 100  
211 different genes in order to service the approximately 2000 protein coding genes that are  
212 silenced by the system transgenerationally.

213 Our findings suggest that each P granule is initially seeded with or differentiates  
214 to contain distinct RNA information, and that they utilize this information to guide the  
215 transgenerational regulation of their target genes. During oogenesis pachytene P  
216 granules dissociate from germ nuclei and flow into the core cytoplasm. P granules from  
217 multiple nuclei are captured along with cytoplasm within each maturing oocyte <sup>21</sup>. P  
218 granules have liquid-like properties <sup>22</sup> and in the early embryos maternally derived P  
219 granules dissolve and reform in early germline blastomeres <sup>23</sup>. These embryonic P  
220 granules co-localize with parentally derived Argonaute guide complexes <sup>24,25</sup>. Mutations  
221 that disrupt embryonic P granules impair transgenerational inheritance of Argonaute

222 silencing signals <sup>26,27</sup>. Thus it seems likely that when gene expression initiates in the  
223 zygotic germline, inherited silencing signals in these embryonic P granules guide the  
224 relocalization of germline chromatin to initiate a new round of guide RNA biogenesis  
225 and nuage differentiation. If future technical advances permit the direct detection of  
226 small RNA species in individual embryonic P granules, it will be interesting to examine  
227 whether Argonaute-guide complexes targeting a single gene, for example *xol-1*, or  
228 discrete groups of genes, for example those that were served by one pachytene P  
229 granule, remain together or whether they become shuffled during the dynamics of early  
230 embryogenesis. Whether similar seeds of information form and migrate within and  
231 between somatic cells or move from the soma to the germline, and how nuage-like  
232 particles compartmentalize and transmit information, and how they orchestrate DNA  
233 relocalization, will all require further study. The image of nuage that emerges from these  
234 studies mirrors Darwin's notion of gemmules as the units of heredity <sup>28,29</sup>—seeds of  
235 parental information that accumulate in germ cells to guide inheritance.

236

237 **Acknowledgements:** We thank Susan Strome from UC Santa Cruz MCD Biology and  
238 Karen Bennett from University of Missouri, School of Medicine for kindly gifting  
239 reagents, Christina Baer from SCOPE at UMMS for support with the micromanager  
240 installation. We thank Darryl Conte, and members of the Mello and Grunwald labs for  
241 help with preparation of the manuscript. This work was supported by a Howard Hughes  
242 Medical Institute Investigatorship and NIH R37GM058800 (C.C.M), NSF grant 1614940  
243 (D.G.), and NIH RO1GM098583 (J.R.P). . Some of the strains used in this work were

244 provided by the Caenorhabditis Genetic Center, which is funded by the NIH National  
245 Center for Research Resources (NCRR).

246

247

248

249 **Methods:**

250 **Worm culture:**

251 The wild-type strain N2 was used and nematodes were cultured as described in<sup>30</sup>. The  
252 following transgenic strains were used: **JJ2101**: *zuls242*; [*nmy-2p::PGL-1::GFP* + *unc-*  
253 *119(+)*]<sup>6</sup> **ZYG-12:GFP** **JJ2212**: [*nmy-2p::PGL-1::mRFP*]. **WH223**: *ojls9*; [*ZYG-12::GFP*  
254 + *unc-119(+)*]<sup>11</sup> and WM455, *gfp::flag::xol-1* (*ne4555*)<sup>20</sup>.

255 **Sample preparation for combined FISH, GFP detection and Immunofluorescence**

256 General techniques for gonad dissections were used as described<sup>31</sup>. Briefly, worms  
257 were rinsed free of bacteria, then collected in PBS containing 0.1 mM tertramisole  
258 (SIGMA L9756) as a paralytic. Once the worms stopped moving, they were placed in  
259 PBS for dissection. In some preparations, 0.1% Tween-20 was used to facilitate gonad  
260 transfer by micropipette. The dissected gonads were suspended briefly in buffer A (75  
261 mM Hepes (pH 6.9), 40 mM NaCl, 5 mM KCl, 2 mM MgCl<sub>2</sub>, 1 mM EGTA; all  
262 chemicals from Sigma), to which was added a equal volume of fixative buffer B was  
263 added (5% paraformaldehyde, 7.5 mM Hepes (pH 7.2), 12 mM NaCl, 1.0 mM KCl, 0.6  
264 mM MgCl<sub>2</sub>, 0.3 mM EGTA; all chemicals from Sigma). After fixing for 15 mins, the  
265 gonads were rinsed, then incubated in RNase-free PBS (ThermoFisher AM9624)  
266 containing 0.1% Triton-X100 (Sigma) for 10 mins. The gonads were transferred to room

267 temperature MeOH for 10 mins, then placed in fixative buffer B for an additional 5 mins  
268 and rinsed in PBS. Gonads were then dehydrated and stored in EtOH.

### 269 **RNA and DNA FISH**

270 Gonads stored in EtOH were rehydrated in an EtOH/PBS series, then rinsed and  
271 incubated in two changes of wash buffer C (10% formamide, 2XSSC [0.3M NaCL, 30  
272 mM sodium citrate (7.0)], 5 mins each. Then the sample was incubated in wash buffer C  
273 5°C for 1-3 min, 70° for 3 min, and 60°C for 10-20 min.

274 The wash buffer was replaced with a solution containing ~0.01µM oligo probes  
275 (RNA and primary DNA probes), 90% RNA FISH hybridization buffer (Stellaris SMF-  
276 HB-1), and 10% formamide, and incubated at 37°C overnight in the dark. The samples  
277 were rinsed and incubated in wash buffer C for 10 mins at room temperature, then  
278 incubated in additional wash buffer at 37°C for 1 hr. The wash buffer was removed and  
279 replaced for a second incubation in wash buffer at 37°C for 1 hr. For RNA FISH  
280 experiments, the gonads were rinsed and held in PBS for immunostaining. For  
281 combined RNA and DNA FISH experiments, the gonads were treated with an additional  
282 solution containing 0.01 µM Bridge oligo, 0.01µM detection oligo in 2XSSC, 30%  
283 formamide at room temperature for 3 hrs. Gonads were washed in prewarmed 2XSSC  
284 at 60°C for 20 min, followed by two washes in 2XSSCT (2XSSC with 0.3% Triton X-100)  
285 at 60°C for 5 min each, and a wash in 2XSSCT at 60°C for 20 min. Samples were then  
286 rinsed at room temperature in 2XSSC. The gonads were rinsed and held in PBS.

### 287 **Immunostaining**

288 After the FISH protocol was complete gonads in PBS were incubated with primary  
289 antibodies diluted in PBS and 0.5 units/µl of RNasin (Promega N261A) at 4°C overnight.

290 The antibody solution was removed and the slides rinsed in three changes of PBS, 5  
291 min each. The gonads were then incubated in secondary antibodies diluted in PBS and  
292 0.5 units/ $\mu$ l of RNasin at room temperature for 2 hours. The gonads were rinsed briefly  
293 in PBS, then immersed in mounting medium with DAPI (Vectashield H-2000) for  
294 imaging. The following antibodies were used: Rabbit anti-PGL-1, a gift from Susan  
295 Strome,<sup>32</sup> Chicken anti-GLH-2, a gift from Karen Bennett<sup>33</sup>.

296 **Microscope settings and configuration:**

297 All images were acquired on a Yokogawa CSU21 spinning disk confocal microscope  
298 mounted onto an Axiovert 200M using a 63x Planapo oil immersion objective with 1.4  
299 N.A. and Zeiss immersion oil. The spinning disk unit add roughly a 2.5 x magnification  
300 factor resulting in a pixel size of  $\sim$ 100 nm in the image plane. Images were acquired  
301 with a Hamamatsu ImageEM (model c9100-13) series camera using an EM gain of 300.  
302 Light from four lasers in a custom laser module (made by Solamere) containing 405 nm,  
303 488 nm, 561 nm and 640 nm laser lines was coupled into a monomode optical fiber and  
304 delivered to the Yokogawa scan head. The following bandpass filters (Chroma) were  
305 used as emission filters ET-460-50, ET-525-50, ET-605-52, ET-700-75. The sample  
306 was mounted using a slide holder and motorized stage (ASI). The microscope was  
307 operated using Micromanager<sup>34</sup> software. The integration time per frame was set to 500  
308 ms per frame, except for imaging of the P granula marker GFP::GLH-1 for which the  
309 integration time was 400 ms. The camera was set to free read mode. Laser power was  
310 adjusted for each sample such as to provide enough signal while keeping bleaching of  
311 the sample at bay. The step width between planes along the optical axis was set to 500  
312 nm.

313

314 **Image processing:**

315 All images were stitched from 9 sub-images that have 50% overlapping with adjacent  
316 image <sup>35</sup>, but subregions were cropped to size to show desired features in the final  
317 figure. Spatial offsets between color channels in lateral (x,y) and axial (z) directions  
318 were estimated from bead image stacks using 500 nm sized four color-stained beads  
319 (Tetraspecks, Thermo Fisher, Catalog number T14792). The center plane is defined as  
320 the plane with the largest diameter signal within a bead and was determined manually in  
321 an unprocessed bead image stack. Raw image stacks, after axial offset correction, were  
322 filtered using a Gaussian kernel with a width  $\sigma = 1$ , a Laplacian of Gaussian (LoG3D  
323 filter <sup>36</sup>) followed by a Gaussian kernel with a width  $\sigma = 1$ . The sigma for the LoG3D is  
324 chosen for each channel in full pixel values such as to maintain what appears to be the  
325 typical spot size for the channel. LoG3D is used for background suppression and not to  
326 localize the exact position of a spot. The sigma along the optical axis is taken as roughly  
327 half the number of slices the signal is visible in. This approach preserves the visual  
328 impression of signal dimension between the channels. The sigma for each channel  
329 used was: Ch1:  $\sigma_{x,y} = 1$  pixel,  $\sigma_z = 2$  pixel; Ch2:  $\sigma_{x,y} = 1$  pixel,  $\sigma_z = 2$  pixel; Ch3:  $\sigma_{x,y} = 1$   
330 pixel,  $\sigma_z = 2$  pixel.

331

332

333 **Figure legends:**

334 **Figure 1.** (A-L) Merged confocal images of RNA, DNA and Protein signals (as  
335 indicated) within the adult hermaphrodite pachytene germline during a time course of  
336 *oma-1(RNAi)*. Each larger image shows a projection of ~30 z-layers extending through  
337 the entire thickness of the cylindrical gonad. Three smaller insets beneath each  
338 projection show enlarged single z-sections through individual nuclei. The coincidence  
339 of DNA (green) and RNA (magenta) in (A and C) results in a white signal visible in both  
340 the larger multiple z layer projections and in each z-section inset. Similarly, coincidence  
341 of P granule (green) and RNA (magenta) signals appear as white in (J, K and L). The  
342 scale bar is shown in A. Each of the three horizontal rows corresponds to a time point  
343 as indicated at the left (0, 6 and 21 hr). In each row the left pair of images show a  
344 gonad stained to detect RNA, DNA and the Nuclear Envelope protein (ZYG-12) and the  
345 right pair show a separate gonad stained for RNA DNA and the P granule protein  
346 (GFP::GLH-1).

347

348 **Figure 2.** (A-H) Merged confocal images, as in Figure 1, of *oma-1(RNAi)* in wild-type  
349 (wt) worms or RNAi pathway mutants at 6-hr and 21-hr time points (as indicated). Each  
350 larger image show Z-projections of merged RNA (magenta) and DNA (green) signals  
351 within the mid-pachytene region of adult hermaphrodite gonads. The insets show  
352 merged RNA (magenta) and P granule (green) signals in individual z-sections. The  
353 coincidence of signal is white. P granules were detected using a mixture of sera  
354 specific for GLH-2 and PGL-1.



355

356 **Figure 3.** (A-D) Merged confocal images as in Figures 1 and 2 showing wt and *prg-1*  
357 mutants (as indicated) expressing the endogenous piRNA-regulated *xol-1* gene fused to  
358 *gfp*. DNA and RNA FISH signals were detected with *gfp* specific probes. P granules  
359 were detected as described in Figure 2. The insets show individual z-sections and  
360 coincident signals are white.

361 **Figure 4.** Model

362 References:

363

364

- 365 1 Watanabe, T. & Lin, H. Posttranscriptional regulation of gene expression by Piwi  
366 proteins and piRNAs. *Mol Cell* **56**, 18-27, doi:10.1016/j.molcel.2014.09.012 (2014).  
367 2 Holoch, D. & Moazed, D. RNA-mediated epigenetic regulation of gene expression. *Nat*  
368 *Rev Genet* **16**, 71-84, doi:10.1038/nrg3863 (2015).  
369 3 Updike, D. & Strome, S. P granule assembly and function in *Caenorhabditis elegans*  
370 germ cells. *J Androl* **31**, 53-60, doi:10.2164/jandrol.109.008292 (2010).  
371 4 Billi, A. C., Fischer, S. E. & Kim, J. K. Endogenous RNAi pathways in *C. elegans*.  
372 *WormBook*, 1-49, doi:10.1895/wormbook.1.170.1 (2014).  
373 5 Pitt, J. N., Schisa, J. A. & Priess, J. R. P granules in the germ cells of *Caenorhabditis*  
374 *elegans* adults are associated with clusters of nuclear pores and contain RNA. *Dev*  
375 *Biol* **219**, 315-333, doi:10.1006/dbio.2000.9607 (2000).  
376 6 Sheth, U., Pitt, J., Dennis, S. & Priess, J. R. Perinuclear P granules are the principal  
377 sites of mRNA export in adult *C. elegans* germ cells. *Development* **137**, 1305-1314,  
378 doi:10.1242/dev.044255 (2010).  
379 7 Fire, A. *et al.* Potent and specific genetic interference by double-stranded RNA in  
380 *Caenorhabditis elegans*. *Nature* **391**, 806-811, doi:10.1038/35888 (1998).  
381 8 Ji, N. & van Oudenaarden, A. Single molecule fluorescent in situ hybridization  
382 (smFISH) of *C. elegans* worms and embryos. *WormBook*, 1-16,  
383 doi:10.1895/wormbook.1.153.1 (2012).  
384 9 Fields, B. D., Nguyen, S. C., Nir, G. & Kennedy, S. A multiplexed DNA FISH strategy for  
385 assessing genome architecture in *Caenorhabditis elegans*. *Elife* **8**,  
386 doi:10.7554/eLife.42823 (2019).

- 387 10 Beliveau, B. J. *et al.* Single-molecule super-resolution imaging of chromosomes and  
388 in situ haplotype visualization using Oligopaint FISH probes. *Nat Commun* **6**, 7147,  
389 doi:10.1038/ncomms8147 (2015).
- 390 11 Malone, C. J. *et al.* The *C. elegans* hook protein, ZYG-12, mediates the essential  
391 attachment between the centrosome and nucleus. *Cell* **115**, 825-836,  
392 doi:10.1016/s0092-8674(03)00985-1 (2003).
- 393 12 Roussel, D. L. & Bennett, K. L. glh-1, a germ-line putative RNA helicase from  
394 *Caenorhabditis*, has four zinc fingers. *Proc Natl Acad Sci U S A* **90**, 9300-9304,  
395 doi:10.1073/pnas.90.20.9300 (1993).
- 396 13 Chen, C. C. *et al.* A member of the polymerase beta nucleotidyltransferase  
397 superfamily is required for RNA interference in *C. elegans*. *Curr Biol* **15**, 378-383,  
398 doi:10.1016/j.cub.2005.01.009 (2005).
- 399 14 Burton, N. O., Burkhart, K. B. & Kennedy, S. Nuclear RNAi maintains heritable gene  
400 silencing in *Caenorhabditis elegans*. *Proc Natl Acad Sci U S A* **108**, 19683-19688,  
401 doi:10.1073/pnas.1113310108 (2011).
- 402 15 Ahringer, J. & Gasser, S. M. Repressive Chromatin in *Caenorhabditis elegans*:  
403 Establishment, Composition, and Function. *Genetics* **208**, 491-511,  
404 doi:10.1534/genetics.117.300386 (2018).
- 405 16 Buckley, B. A. *et al.* A nuclear Argonaute promotes multigenerational epigenetic  
406 inheritance and germline immortality. *Nature* **489**, 447-451,  
407 doi:10.1038/nature11352 (2012).
- 408 17 Ashe, A. *et al.* piRNAs can trigger a multigenerational epigenetic memory in the  
409 germline of *C. elegans*. *Cell* **150**, 88-99, doi:10.1016/j.cell.2012.06.018 (2012).
- 410 18 Shirayama, M. *et al.* piRNAs initiate an epigenetic memory of nonself RNA in the *C.*  
411 *elegans* germline. *Cell* **150**, 65-77, doi:10.1016/j.cell.2012.06.015 (2012).
- 412 19 Guang, S. *et al.* Small regulatory RNAs inhibit RNA polymerase II during the  
413 elongation phase of transcription. *Nature* **465**, 1097-1101,  
414 doi:10.1038/nature09095 (2010).
- 415 20 Tang, W. *et al.* A Sex Chromosome piRNA Promotes Robust Dosage Compensation  
416 and Sex Determination in *C. elegans*. *Dev Cell* **44**, 762-770 e763,  
417 doi:10.1016/j.devcel.2018.01.025 (2018).
- 418 21 Wolke, U., Jezuit, E. A. & Priess, J. R. Actin-dependent cytoplasmic streaming in *C.*  
419 *elegans* oogenesis. *Development* **134**, 2227-2236, doi:10.1242/dev.004952 (2007).
- 420 22 Brangwynne, C. P. *et al.* Germline P granules are liquid droplets that localize by  
421 controlled dissolution/condensation. *Science* **324**, 1729-1732,  
422 doi:10.1126/science.1172046 (2009).
- 423 23 Seydoux, G. The P Granules of *C. elegans*: A Genetic Model for the Study of RNA-  
424 Protein Condensates. *J Mol Biol* **430**, 4702-4710, doi:10.1016/j.jmb.2018.08.007  
425 (2018).
- 426 24 Claycomb, J. M. *et al.* The Argonaute CSR-1 and its 22G-RNA cofactors are required  
427 for holocentric chromosome segregation. *Cell* **139**, 123-134,  
428 doi:10.1016/j.cell.2009.09.014 (2009).
- 429 25 Gu, W. *et al.* Distinct argonaute-mediated 22G-RNA pathways direct genome  
430 surveillance in the *C. elegans* germline. *Mol Cell* **36**, 231-244,  
431 doi:10.1016/j.molcel.2009.09.020 (2009).

- 432 26 Dodson, A. E. & Kennedy, S. Germ Granules Coordinate RNA-Based Epigenetic  
433 Inheritance Pathways. *Dev Cell* **50**, 704-715 e704, doi:10.1016/j.devcel.2019.07.025  
434 (2019).
- 435 27 Ouyang, J. P. T. *et al.* P Granules Protect RNA Interference Genes from Silencing by  
436 piRNAs. *Dev Cell* **50**, 716-728 e716, doi:10.1016/j.devcel.2019.07.026 (2019).
- 437 28 Choi, Y. & Mango, S. E. Hunting for Darwin's gemmules and Lamarck's fluid:  
438 transgenerational signaling and histone methylation. *Biochim Biophys Acta* **1839**,  
439 1440-1453, doi:10.1016/j.bbagr.2014.05.011 (2014).
- 440 29 Liu, Y. In Search of Darwin's Imaginary Gemmules. *Adv Genet* **101**, 87-114,  
441 doi:10.1016/bs.adgen.2018.05.004 (2018).
- 442 30 Brenner, S. The genetics of *Caenorhabditis elegans*. *Genetics* **77**, 71-94 (1974).
- 443 31 Raiders, S. A., Eastwood, M. D., Bacher, M. & Priess, J. R. Binucleate germ cells in  
444 *Caenorhabditis elegans* are removed by physiological apoptosis. *PLoS Genet* **14**,  
445 e1007417, doi:10.1371/journal.pgen.1007417 (2018).
- 446 32 Kawasaki, I. *et al.* PGL-1, a predicted RNA-binding component of germ granules, is  
447 essential for fertility in *C. elegans*. *Cell* **94**, 635-645, doi:10.1016/s0092-  
448 8674(00)81605-0 (1998).
- 449 33 Gruidl, M. E. *et al.* Multiple potential germ-line helicases are components of the  
450 germ-line-specific P granules of *Caenorhabditis elegans*. *Proc Natl Acad Sci U S A* **93**,  
451 13837-13842, doi:10.1073/pnas.93.24.13837 (1996).
- 452 34 Edelstein, A., Amodaj, N., Hoover, K., Vale, R. & Stuurman, N. Computer control of  
453 microscopes using microManager. *Curr Protoc Mol Biol* **Chapter 14**, Unit14 20,  
454 doi:10.1002/0471142727.mb1420s92 (2010).
- 455 35 Preibisch, S., Saalfeld, S. & Tomancak, P. Globally optimal stitching of tiled 3D  
456 microscopic image acquisitions. *Bioinformatics* **25**, 1463-1465,  
457 doi:10.1093/bioinformatics/btp184 (2009).
- 458 36 Sage, D., Neumann, F. R., Hediger, F., Gasser, S. M. & Unser, M. Automatic tracking of  
459 individual fluorescence particles: application to the study of chromosome dynamics.  
460 *IEEE Trans Image Process* **14**, 1372-1383, doi:10.1109/tip.2005.852787 (2005).  
461

Figure 1

<https://doi.org/10.1101/2021.03.09.434681>

DNA/RNA

Nuclear Env/RNA

P-granule/DNA

P-granule/RNA

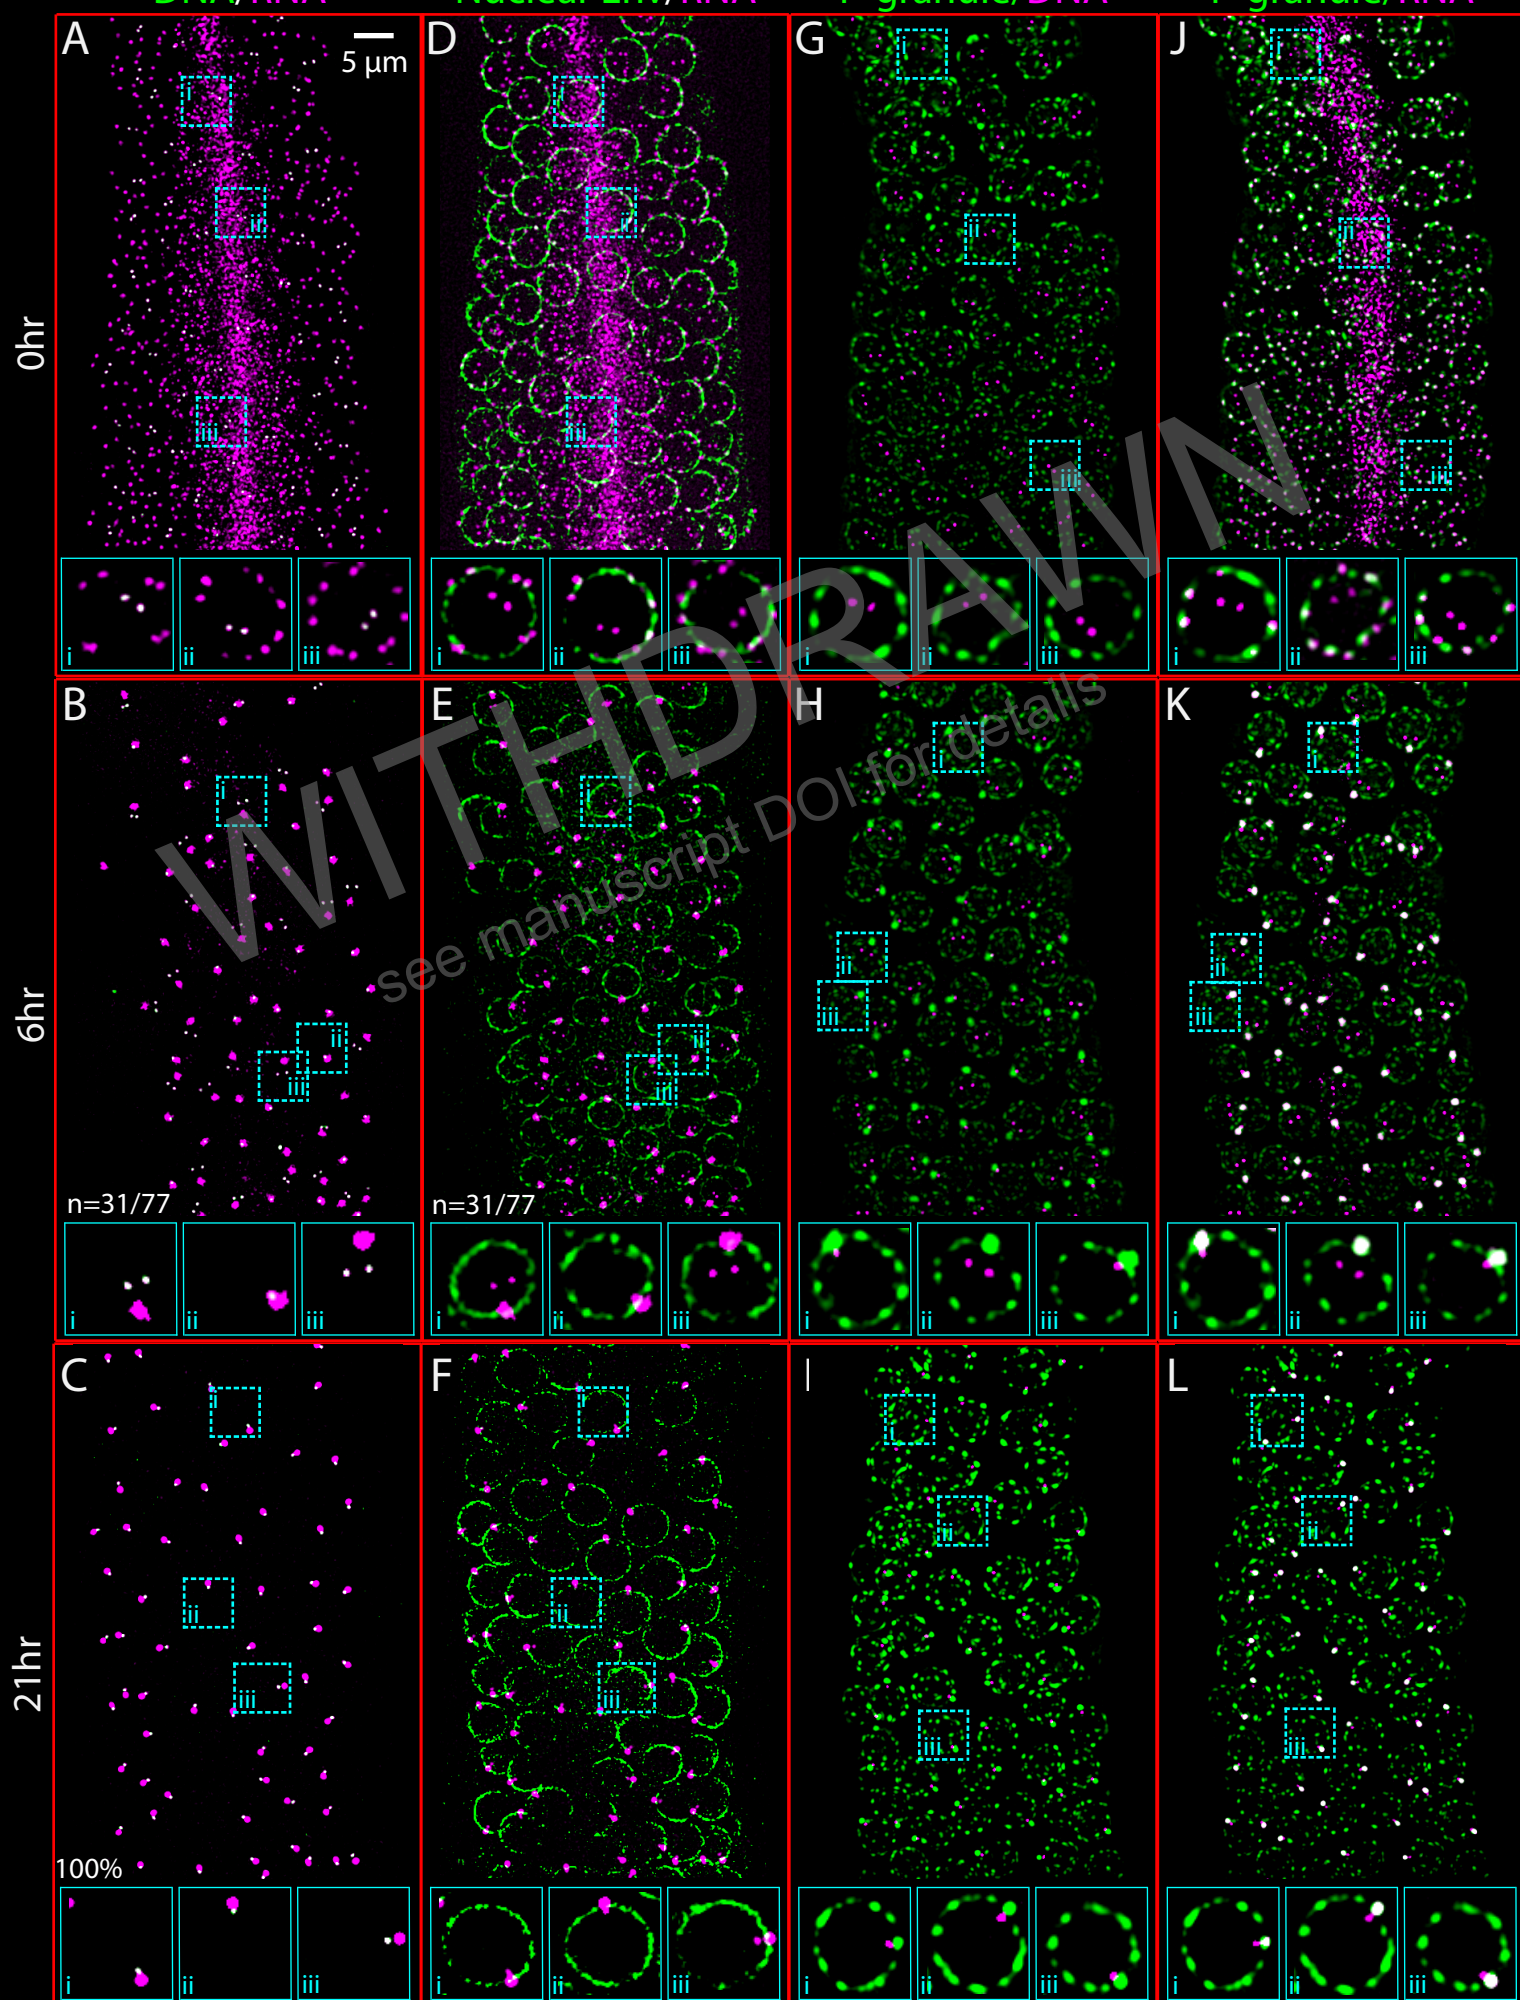

Figure 2

6hr

21hr

DNA/RNA

P-granule/RNA

DNA/RNA

P-granule/RNA

*rde-3*

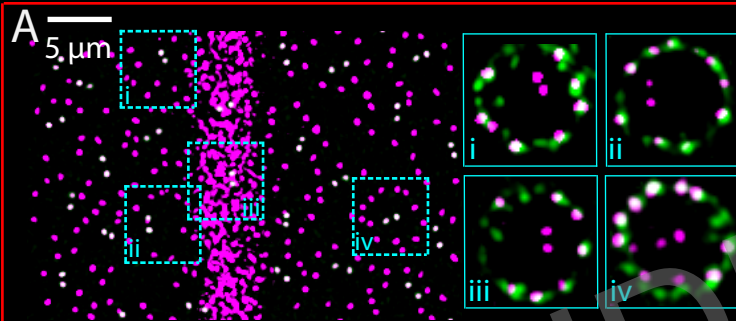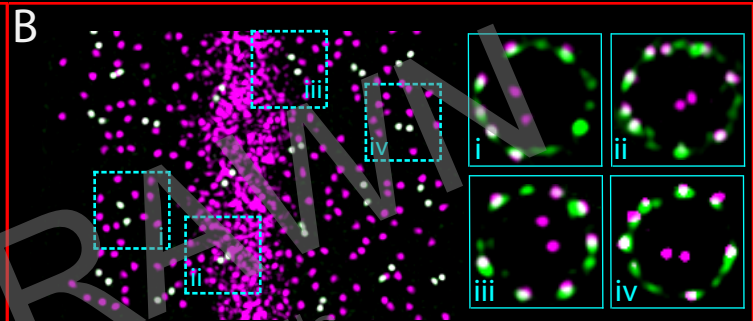

*wt*

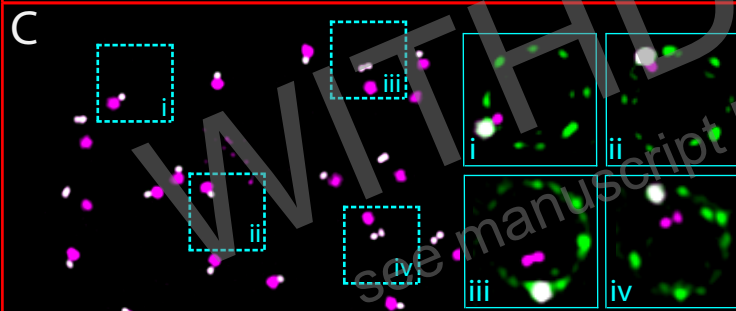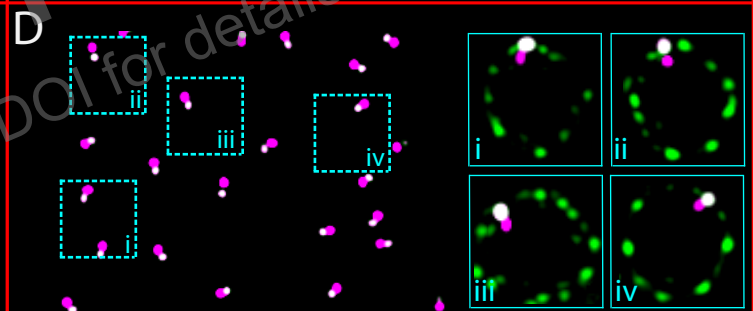

*wago-9*

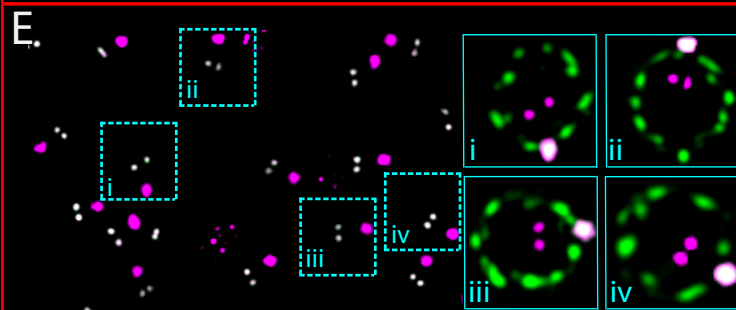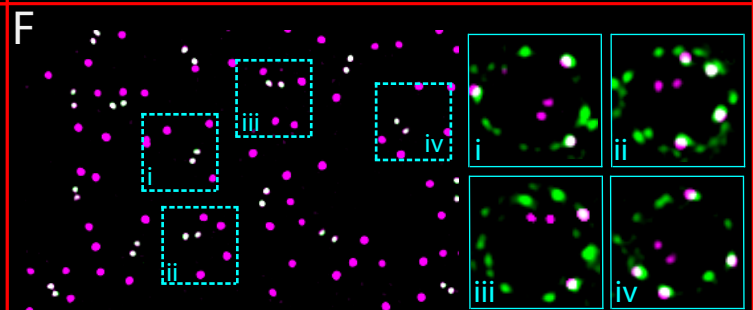

*nrde-2*

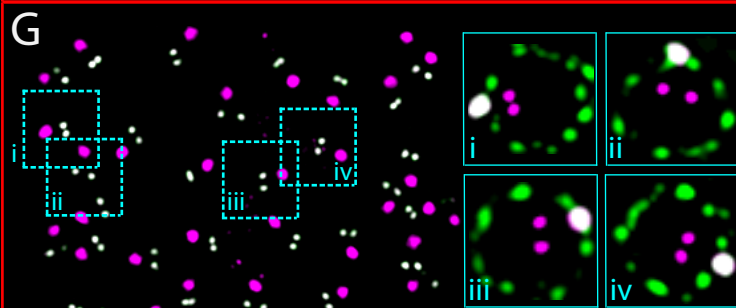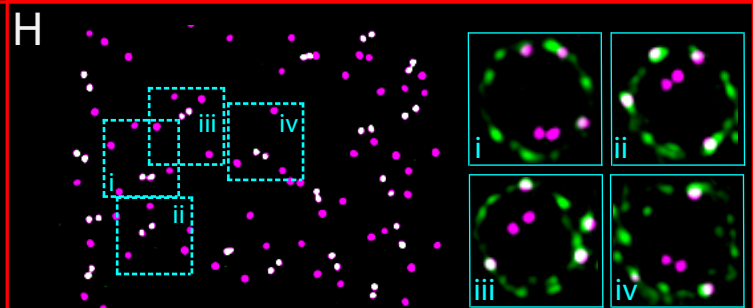

Figure 3

*prg-1* XOL-1(ON)

wt XOL-1(OFF)

DNA/RNA

P-granule/RNA

DNA/RNA

P-granule/RNA

late ← early  
late-pachytene ← early-pachytene

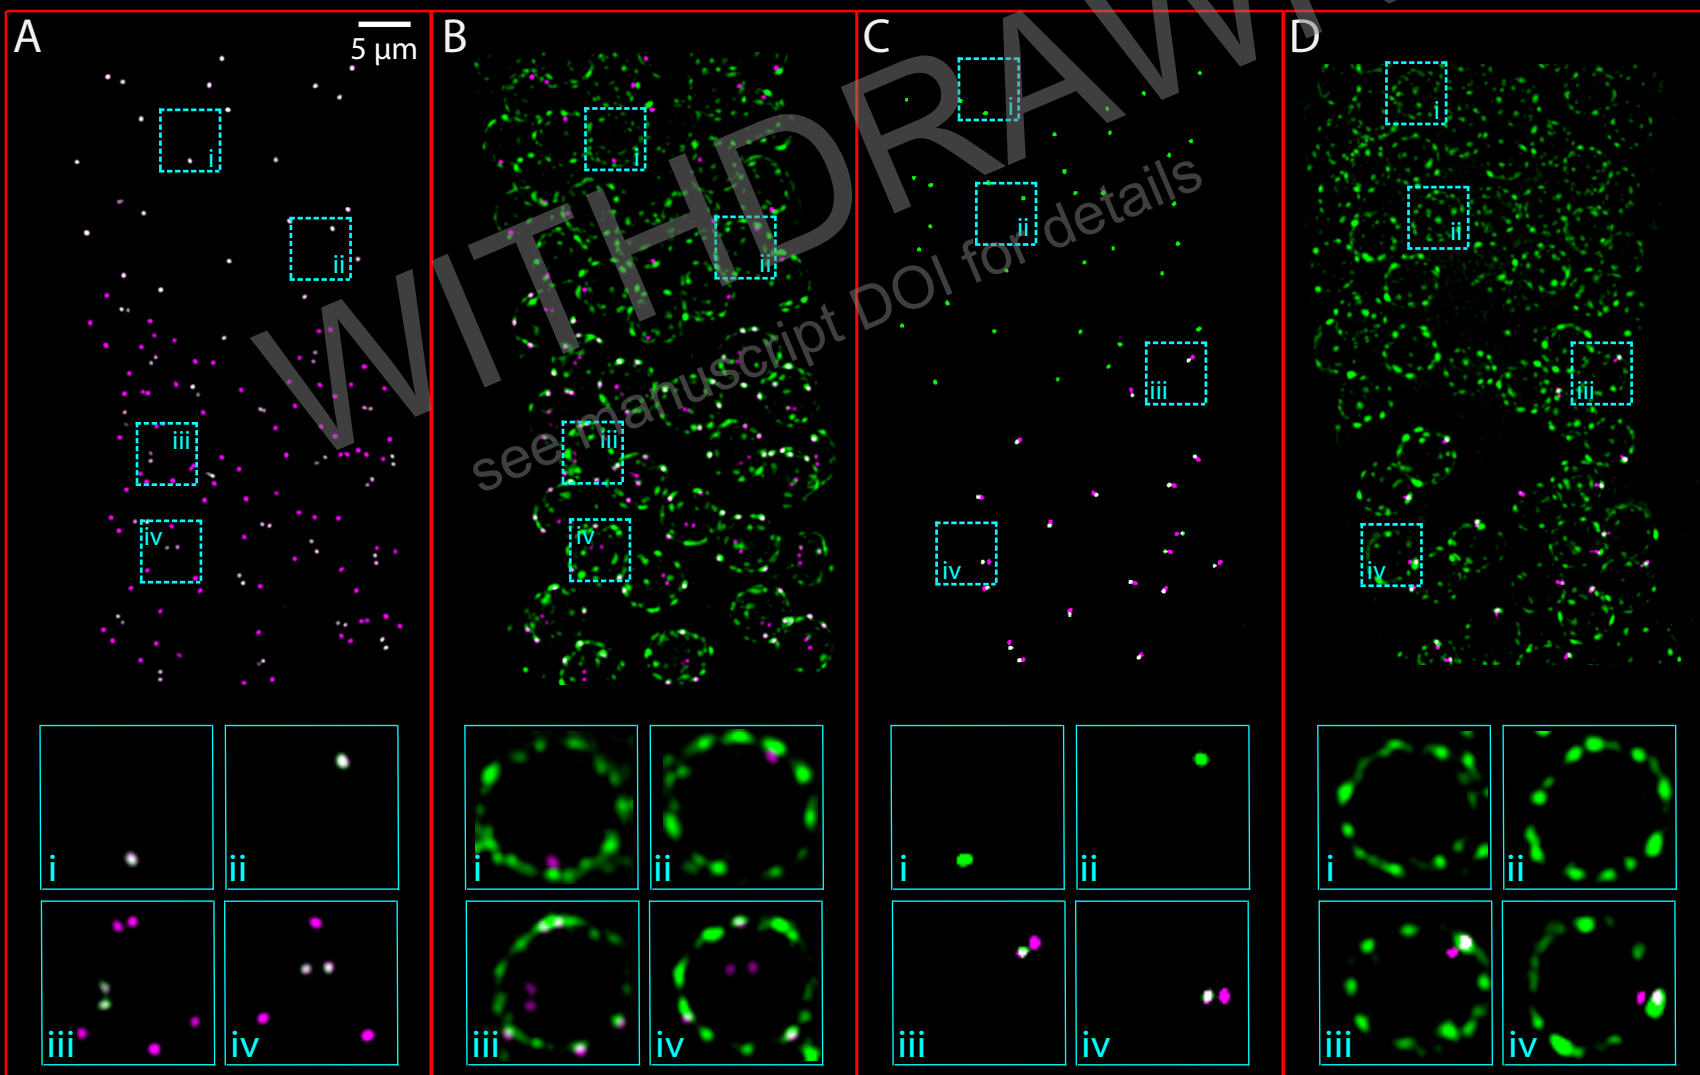

**Figure 4 Model**

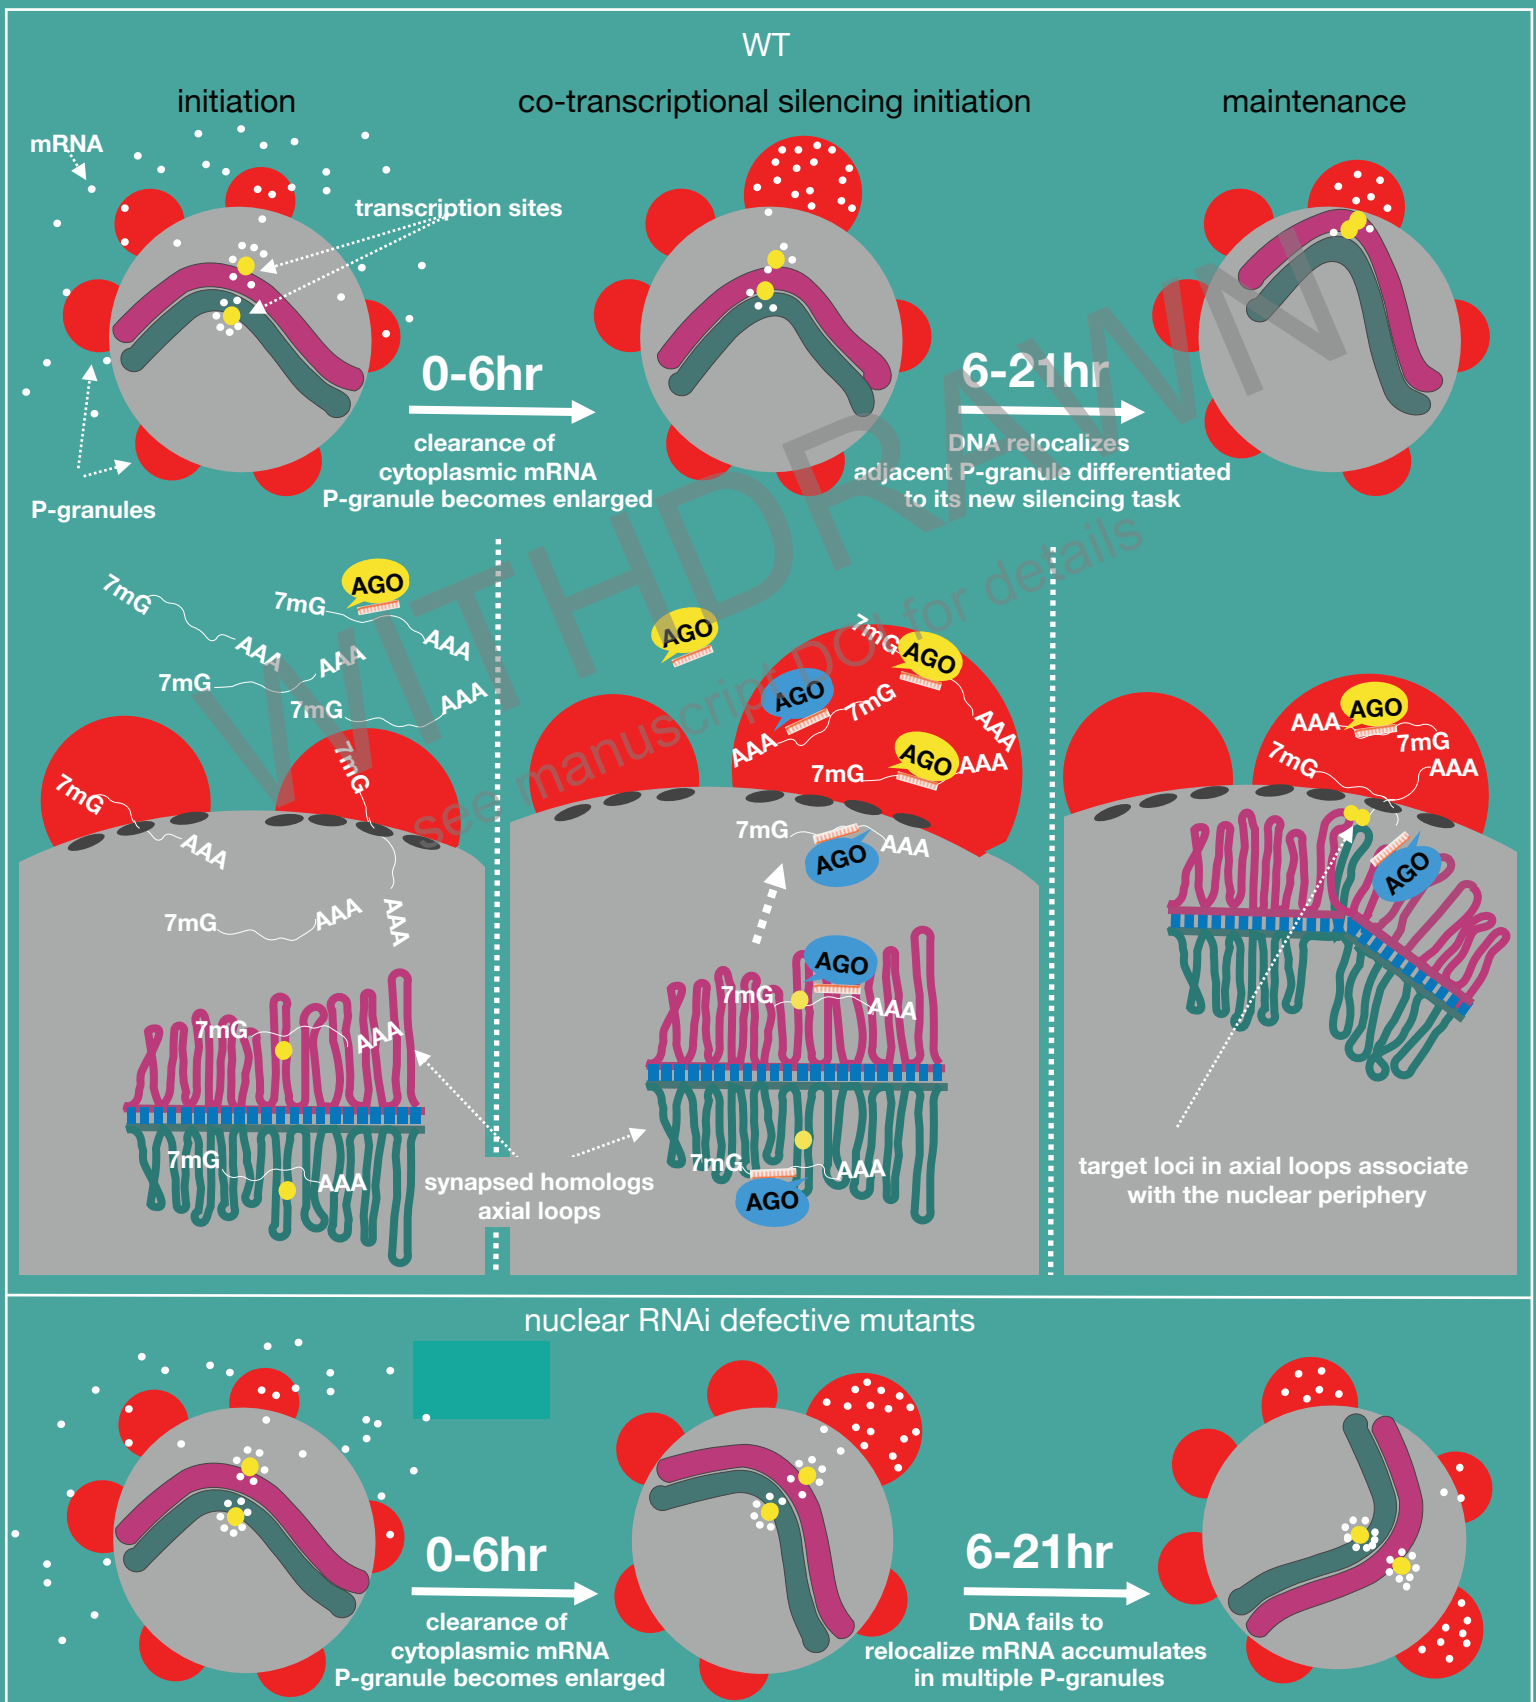

DNA/RNA

P-granule/RNA

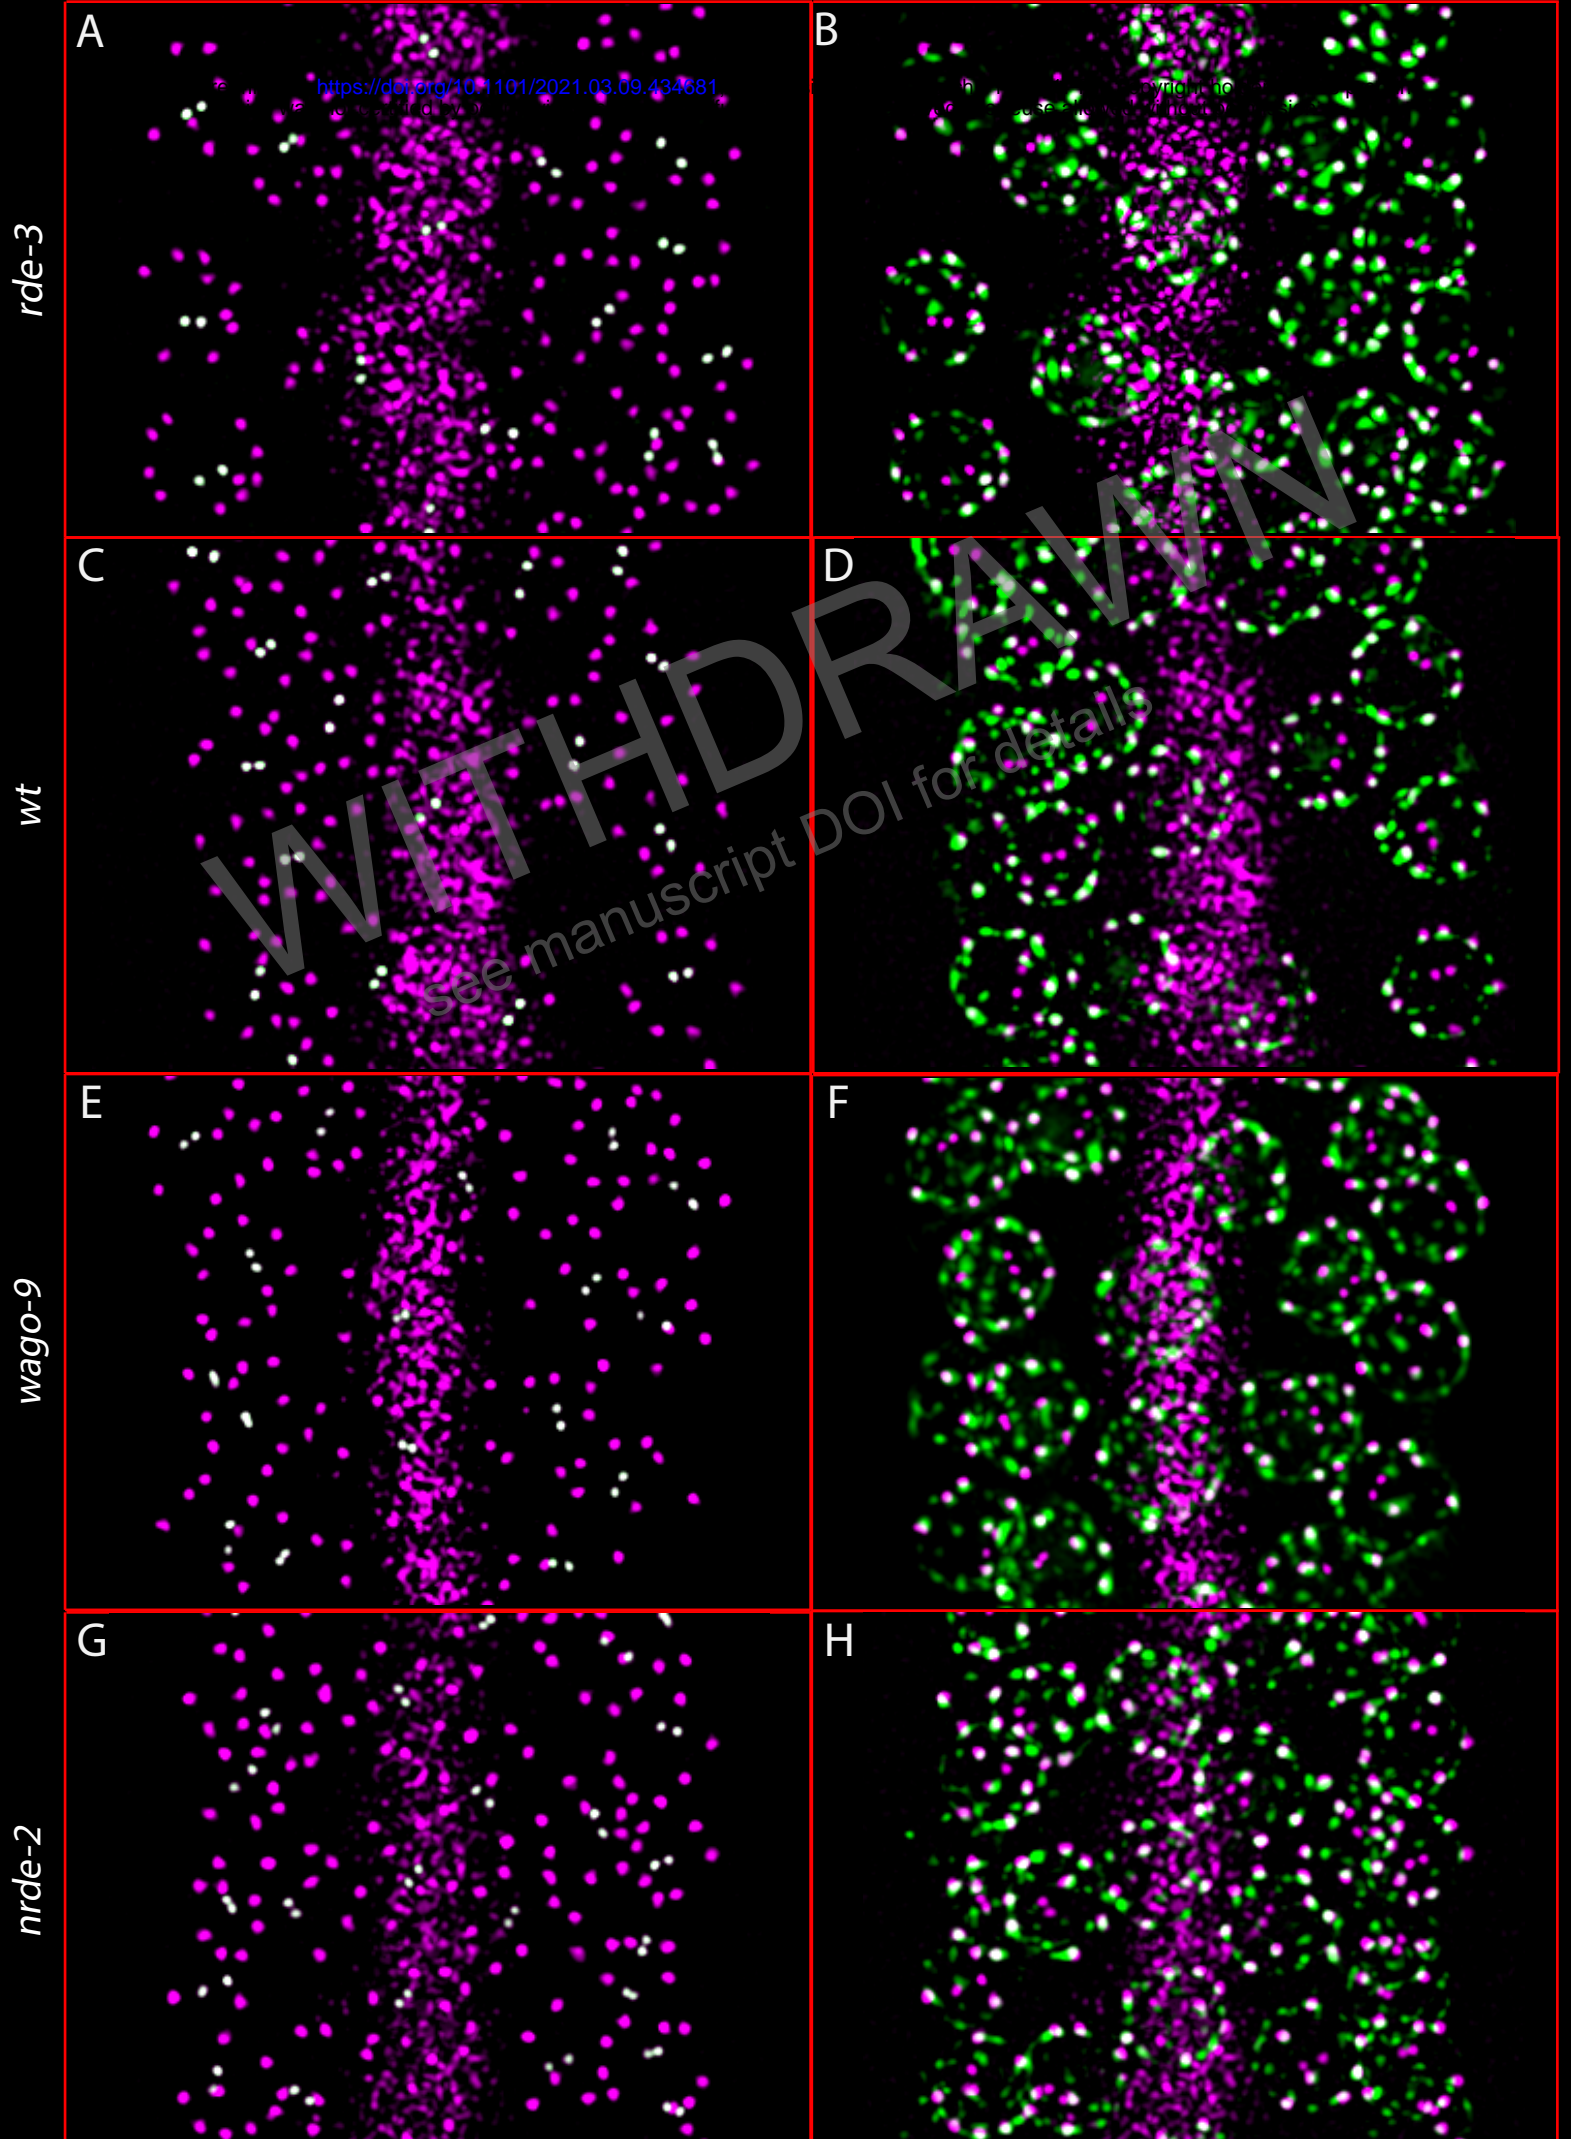

Source: https://www.biorxiv.org/content/10.1101/2021.03.09.434681v1.full.pdf
